# Supplementary material for: The PlcR Virulence Regulon of Bacillus cereus
Source: PLoS One. 2008 Jul 30;3(7):e2793. doi: 10.1371/journal.pone.0002793 (PMC2464732; doi:10.1371/journal.pone.0002793)
Supplement: Figure S5 — Putative −10 σA boxes located downstream of PlcR boxes for PlcR-controlled genes (0.60 MB PDF) [file pone.0002793.s009.pdf]

|                                                       |         |
|-------------------------------------------------------|---------|
| AAAAGTACAAAAATATGCAATATTACATATTGGAACCTCAACAAAATAC     | Bc2410  |
| TCCATTGATAAGTACATAGATCGAACGAAGGCATCGTT                | Bc1082  |
| AAAGATTCTCAATATGTAATATTGCATATTGGCCGTTTTATAGTTTTAA     | Bc1809  |
| TATTTATTTTAAAAAGAAAAAGTACGAGGTGATTCA                  | Bc0576  |
| TTGTGTATATGCTATGCATAATTGCATATGAGTTTAAAAATTATATCGA     | Bc4511  |
| TATAAATTTTATCGGTTATTTGTAAGTAGTGTTCCT                  | Bc1081  |
| ATAAGGAGTGAATATGCAAAAATGCATAATTGACGAAAAAATTACATGT     | Bc5349  |
| TATCATTATATATTGTTTTATATATGTTAATTGTAT                  | Bc2735  |
| TACAAAAGACAATATGCAAAATGTTTCATATAAAAATATTATATTTAATA    | Bc5350  |
| TATAATATAAAAATGATTTTCTAACATCAAGGAGGAT                 | Bc3527  |
| TAAAACGGCCAATATGCAATATTACATATTGAGAATCTTTTTACTCTTGAT   | Bc0381a |
| ACAAATACCATCAAGGAGGAT                                 | Bc0558  |
| CTAAAAAATGGGTATGCATAATTGCATATAATAGAGATAAAATTTTCATGAT  | Bc1110  |
| TATATTAAAAATAAAAATGTGGGTGATGGAATATG                   | Bc1713  |
| TTGACCACAATTATGTAAATTTGCATAATGTTACATAAAATGTGTATTT     | Bc3747  |
| CTCTTTTTTTAGACATTAATAGACAGTATACCTTT                   | Bc2552  |
| TTTTATATATATATATGCATTATTTTCATATCAAAAATTTGTCGAATTCACAT | Bc0686  |
| TATTTGAGTGGTATGACAACCTCAAAAATTTAGATT                  | Bc5351  |
| AGCGGAATATATATATGCATTATTTGCATTTGATAATCATTTTCACTGTAAC  | Bc3181  |
| TATAATGATTACAGGGTTACTATTAATCCAATATT                   | Bc4510  |
| AATACATATCCTTATGCAAAATGCATATTAATATGTATTCTTCTACTTT     | Bc3783  |
| FAAAATTAGCTTAAATCACTTTCCAAATTATACAA                   | Bc3782  |
| AGGAAGAAATAATATGAAATATTGCATTTTATATTGTTACATCCAGATTT    | Bc4999  |
| TATGTTAATGTTTAAATTTAGTAAAGTAAAGTAAAGTAAAGTAAAGTAA     | Bc5101a |
| AGTAAATGTAATACGACATATATCG                             | Bc2463a |
| AAAACGCGCGAATATGCAATTCGCATATTCACACGTTTTATCACAATGTT    | Bc3185a |
| TATGATTTTATGTTTAAATTTGTTATATAAGATATTTAAATATATACATA    | Bc3385  |
| ACTCTTTATTT                                           | Bc3746  |
| GACAATTTTGTATGAAATAATGCATAATATATATAAAATTCGGCAAAATTT   | Bc3104  |
| TCATACAAATCACTAAAAAACTTTACAATTCAAAGGATGACTAAATATACA   | Bc3781  |
| ATTTGAGTTCTTTTATGTGT                                  | Bc3384  |
| TAAAAATAGATATAAAGATATGAAAAATA                         | Bc0362  |
| CATGTAATTAATATGAAATAATACATATTATAATAATTTATTAAGATAAA    | Bc0670  |
| TATATTTTGGGTGGAATATATAAATGGAG                         | Bc0991  |
| ATAATATTTTATATGAACATTTGCATATTGTCTTTTAAATTTGTTATATA    |         |
| AGATATAGTATGTCC                                       |         |
| TATATTAGAAAGATGAGCAAAATAATAA                          |         |
| AATGTATTTTCATATGCAATATTTTCATATTCTGACTCTACACTAAACGA    |         |
| ATATGAAACTTATAGT                                      |         |
| GTAGAGTCAGAAATATGAAATATGCATATGAAATACATTGAAGTTCATAT    |         |
| TTCTGATTACT                                           |         |
| TATATTTGTATTAAGGATTTT                                 |         |
| CTTGTTTTTTTATATGTAATATGCATATCAGAGTGATTGATAAAAGTGTA    |         |
| AAGGGTCACTATAATGAGGCATAAAGATAAAT                      |         |
| CTAATGTATAAAATATGCAATATTCGCATACGGAATGTATTGTATTATTG    |         |
| TAAAGCGTTACTATAATAAAGTTATAAAGATTTAT                   |         |
| AAAACGTATAAAATATGCAATATTCGCATACAGAAATGTATTGTACAAAT    |         |
| GTAAGCGTTACTATAATGAAGGTATAAAGTTAAT                    |         |
| TTTATATCCATATATGCAAAATTACATATATTTAATGATTGATAATCATG    |         |
| AGCTAATGTAAC                                          |         |
| TATAATAATTACACTAATAAGTA                               |         |
| TTTGTAAGTGGAGATGCAAAATTCGCATATAAAATGATGAGTATCTTTTT    |         |
| TTTGGTGAGCTTTT                                        |         |
| TATTTTAATCTGAAGATTAATA                                |         |
| ATATCTACATTTTATGCAATTATACATAACTAAATAAAGGTAAAAAAGTA    |         |
| AAAAAGACCTATTATATTATTCTATAAGTATTTT                    |         |
| TAACCTTTACTTCTATGCAATATTTTCATATTGATGAAATGTTATTTAT     |         |
| TTTTCTGAACTAGCTTATATTATATTCAATAAGTTTG                 |         |
| AGTAGTGGATGATATGCAAAATTCGCATATTACAAAATAAACATCGTAAT    |         |
| TTTTGGATTCTTGGTATAAAATACATTACTTAAACT                  |         |
| AATACATATTAATATGCAATTTTGCATAAGGATATGTATTTTATTAATA     |         |
| TATAAAGATTTTATAC                                      |         |
| TATAATGAAAACCGCTATAA                                  |         |
| AAGTTATAATGATATGAACATTTGCATATTTTAAATTTATTGATAGAAAT    |         |
| TTTCATGAAAGGTGGGATATTC                                |         |
| TAGTCATAGGTTAAC                                       |         |
| TCCTTATAACAAATATGAATTTTGCATATTTTAAATTTCAATATATCCCT    |         |
| CAAAAACCTTTTAAATTTG                                   |         |
| TATAATATATTTTGCATA                                    |         |

Figure S5: Putative -10  $\sigma^A$  boxes located downstream of PlcR boxes for PlcR-controlled genes. The presence of possible -35 boxes were considered for the determination of best -10 boxes locations. While there are 28 active PlcR boxes, 34 -10  $\sigma^A$  boxes are shown because some of the PlcR boxes can work both in the forward and reverse directions.
