# Supplementary material for: The PlcR Virulence Regulon of Bacillus cereus
Source: PLOS journal article supplement (doi:10.1371/journal.pone.0002793), 2008-07-29
Supplement: S4 (10.1371/journal.pone.0002793.s004) [file journal.pone.0002793.s004]

| Gene                | Forward primer                               | Reverse primer                               |
|---------------------|----------------------------------------------|----------------------------------------------|
| Bc0069 <sup>a</sup> | <u>AACTGCAGCTGGCTAGAGCGTACGG</u>             | <u>GCTCTAGAGCTAAAAATGCTAGCGGC</u>            |
| Bc0361 <sup>a</sup> | <u>AAACTGCAGCACGCTATTTCGCTTTAC</u>           | <u>TGCTCTAGATCAGCGTTAAGACTAG</u>             |
| Bc0442 <sup>a</sup> | <u>AAACTGCAGGAGTTGTATGATAAAGGAGATCGG</u>     | <u>GGTCTAGACAATTGGATCCCAGCCTAAG</u>          |
| Bc0556 <sup>a</sup> | <u>AACTGCAGCAGCCAAAATAATCATTTGTAGTC</u>      | <u>GCTCTAGATAAAGCCATTTGTAATAATGCTAAGC</u>    |
| Bc0576 <sup>a</sup> | <u>AAACTGCAGGCGCCAAAATAAATTAGGACG</u>        | <u>GCTCTAGAATGTCTGCAAAGTACGTCCG</u>          |
| Bc0670 <sup>a</sup> | <u>AAACTGCAGTGGGATTGGACTAGTGTGTTGG</u>       | <u>GCTCTAGACTTCAGCAGACCAGCGC</u>             |
| Bc0991 <sup>a</sup> | <u>AAACTGCAGGTTTCAACGGACCAATCAAATGTC</u>     | <u>GGTCTAGACCTTGTGTTTATTCGGTACTAACACTCGA</u> |
| Bc1082 <sup>a</sup> | <u>AAACTGCAGCTATGGATAGAATTTTTTCATAATCAAA</u> | <u>GGTCTAGAGCATCAGTCTCTTTTTACTAACCGT</u>     |
| Bc1111 <sup>a</sup> | <u>AAACTGCAGTATCTGTTACAACCTGTGACGTCCG</u>    | <u>GGTCTAGACCTATCGTTCGCAGAAATGG</u>          |
| Bc1641 <sup>a</sup> | <u>AAACTGCAGCGTTTACATAAAGAACTCCGC</u>        | <u>GCTCTAGAGCAAGTGCATTTTCATTCG</u>           |
| Bc1713 <sup>a</sup> | <u>AAACTGCAGCTTGTACAAATGTATGC</u>            | <u>TGCTCTAGATGACGTGGAATGGAT</u>              |
| Bc2410 <sup>a</sup> | <u>AAACTGCAGACTTGCTCATATAAAATCACCC</u>       | <u>GCTCTAGATAAGAAACAAAACGCTCAGC</u>          |
| Bc2466 <sup>a</sup> | <u>AACTGCAGCAAGCTAAGTTAGCATGTTTAATG</u>      | <u>GCTCTAGATCCATATTTGGCGAACAAG</u>           |
| Bc2707 <sup>c</sup> | <u>CCCAAGCTTTCGCGCTTATAATAAGGAGGAC</u>       | <u>CGGGATCCATCAGTTTCTGTCCCTTCTC</u>          |
| Bc3384 <sup>a</sup> | <u>AAACTGCAGGACTTGCTGAGCAATCTAAAG</u>        | <u>GGTCTAGAGTTCGTTTCATCAGCATGTAAGTGT</u>     |
| Bc3385 <sup>a</sup> | <u>AAACTGCAGTTTATACATCAATGATGGGTTCCCC</u>    | <u>GGTCTAGACCCCAAAACCTATTAGGGATAAT</u>       |
| Bc3520 <sup>c</sup> | <u>CCCAAGCTTTGGGCAGAACATTAAGC</u>            | <u>CGGGATCCGCTTTATTTGCCCAATCTTTC</u>         |
| Bc3521 <sup>c</sup> | <u>CCCAAGCTTTGTATAGCTACATGAGGATTTTGAC</u>    | <u>CGGGATCCCAACCCCTGTCCGAAAG</u>             |
| Bc3528 <sup>b</sup> | <u>CCCAAGCTTTTACGAAAGAAGTTACAGCCTCACC</u>    | <u>GGTCTAGAGCCAGAATACGTGATAGCTAAGG</u>       |
| Bc3740 <sup>a</sup> | <u>AAACTGCAGGCTCTTCAATGCCTAAACCATATG</u>     | <u>GGTCTAGACGGTATTTCTTGATTTGCATGATGG</u>     |
| Bc3747 <sup>a</sup> | <u>AAACTGCAGCGCAGCCATGTATGAT</u>             | <u>TGCTCTAGACGAAGCGTACATCTGAAT</u>           |
| Bc3763 <sup>a</sup> | <u>AAACTGCAGCACTATTGATAGTGCCTCCTGTTC</u>     | <u>GGTCTAGAGTGACATTGTAACGCTTTGCTATC</u>      |
| Bc4142 <sup>a</sup> | <u>AAACTGCAGCGCATTGACTCTGAAACGAC</u>         | <u>GGTCTAGAACTCACTCCCTAATCAGAACGTT</u>       |
| Bc4510 <sup>a</sup> | <u>AAACTGCAGCTTCAGCCTCAGCTTTGTTAATCC</u>     | <u>GGTCTAGACCTAGTACTTCACCTTTTGGTAACGAA</u>   |
| Bc4511 <sup>a</sup> | <u>AAACTGCAGCCCATGTAATCGAACCTTCATTAG</u>     | <u>GGTCTAGAGCTGTTTGATACCATAAATCAGCC</u>      |
| Bc4794 <sup>a</sup> | <u>AACTGCAGCGTAGGACATCACTATCTGAGTTC</u>      | <u>GCTCTAGATCCATTATAAGCCTTCGTCTTTTC</u>      |
| Bc4795 <sup>a</sup> | <u>AAACTGCAGCAATAATAACACCTCCACAACCTGCC</u>   | <u>GGTCTAGAGTCGTCTTCTCGCTTCATTAAAAT</u>      |
| Bc4958 <sup>a</sup> | <u>AAACTGCAGAACTATAAGGTTCTCGTACGTCC</u>      | <u>GGTCTAGACGTGACCTTTTCCTTCTAATTCAC</u>      |
| Bc4986 <sup>a</sup> | <u>AACTGCAGATTGTTAATCAGTTAGAGAAACC</u>       | <u>GCTCTAGATTGCCGTCATATATAACGTTC</u>         |
| Bc5335 <sup>a</sup> | <u>AAACTGCAGGTCAGCTGTGAGAAATGAGC</u>         | <u>GCTCTAGAATTTTTCTTCTTCCGCAGC</u>           |
| Bc5359 <sup>a</sup> | <u>AAACTGCAGAGATGGAAAAATCATCCGAGAAGG</u>     | <u>GGTCTAGACCCATTGATTTAAGCTGCATACCA</u>      |

Table S4: Primers for transcriptional fusions.

Primers used to amplify promoter regions of genes selected for lacZ fusions are given in the table. Restriction sites are underlined and were PstI and XbaI (a), HindIII and XbaI (b), or HindIII and BamHI (c).
