# Supplementary material for: The PlcR Virulence Regulon of Bacillus cereus
Source: PLOS journal article supplement (doi:10.1371/journal.pone.0002793), 2008-07-29
Supplement: S6 (10.1371/journal.pone.0002793.s006) [file journal.pone.0002793.s006]

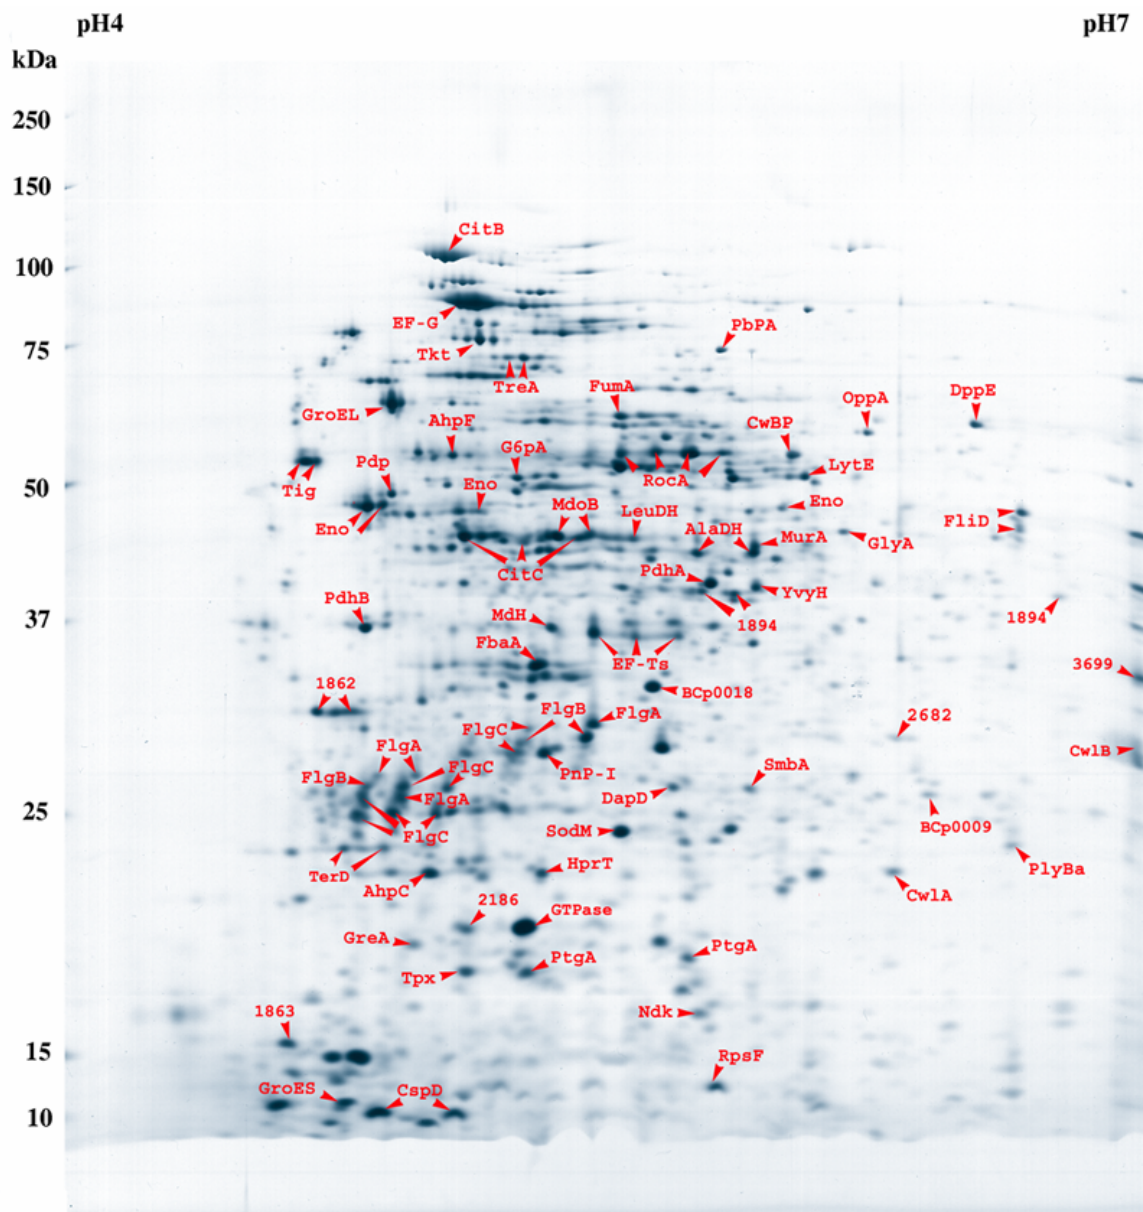

Figure S2: Two-dimensional gel electrophoresis of the  $\Delta$ -plcR ATCC14579 supernatant. The supernatant was harvested at  $t_2$ . The gel was silver-stained. In red, abbreviated name of the proteins present in the spots, and identified by mass spectrometry or by N-terminal sequencing (see table s3). Top scale: pH range; left scale: MW range
