# Supplementary material for: The PlcR Virulence Regulon of Bacillus cereus
Source: PLOS journal article supplement (doi:10.1371/journal.pone.0002793), 2008-07-29
Supplement: S7 (10.1371/journal.pone.0002793.s007) [file journal.pone.0002793.s007]

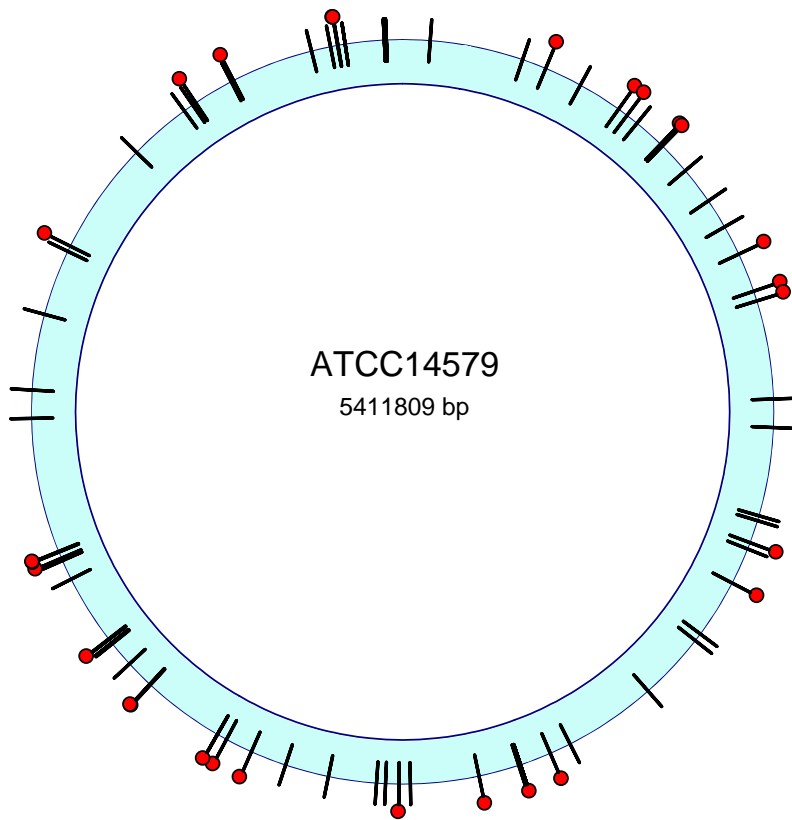

Figure S3: Location of PlcR boxes on the ATCC14579 chromosome. Each dark line represents a PlcR box (active or inactive) and red circles show active PlcR boxes. The chromosome origin is placed on top of the blue circle.
